# Supplementary material for: Toxicity of the Diatom Genus Pseudo-nitzschia (Bacillariophyceae): Insights from Toxicity Tests and Genetic Screening in the Northern Adriatic Sea
Source: MDPI journal article supplement (doi:10.3390/toxins14010060), 2022-01-15
Supplement: s1 [file s1]

Supplementary

# Toxicity of the Diatom Genus *Pseudo-nitzschia* (Bacillariophyceae): Insights from Toxicity Tests and Genetic Screening in the Northern Adriatic Sea

Timotej Turk Dermastia <sup>1,2,\*</sup>, Sonia Dall'Ara <sup>3</sup>, Jožica Dolenc <sup>4</sup> and Patricija Mozetič <sup>1</sup>

<sup>1</sup> Marine Biology Station Piran, National Institute of Biology, 6330 Piran, Slovenia; patricija.mozetic@nib.si

<sup>2</sup> International Postgraduate School Jožef Stefan, 1000 Ljubljana, Slovenia

<sup>3</sup> National Reference Laboratory for Marine Biotoxins, Centro Ricerche Marine, 47042 Cesenatico, Italy; sonia.dallara@centroricerchemarine.it

<sup>4</sup> Institute of Food Safety, Feed and Environment, Veterinary Faculty, University of Ljubljana, 1000 Ljubljana, Slovenia; jozica.dolenc@vf.uni-lj.si

\* Correspondence: timotej.turkdermastia@nib.si

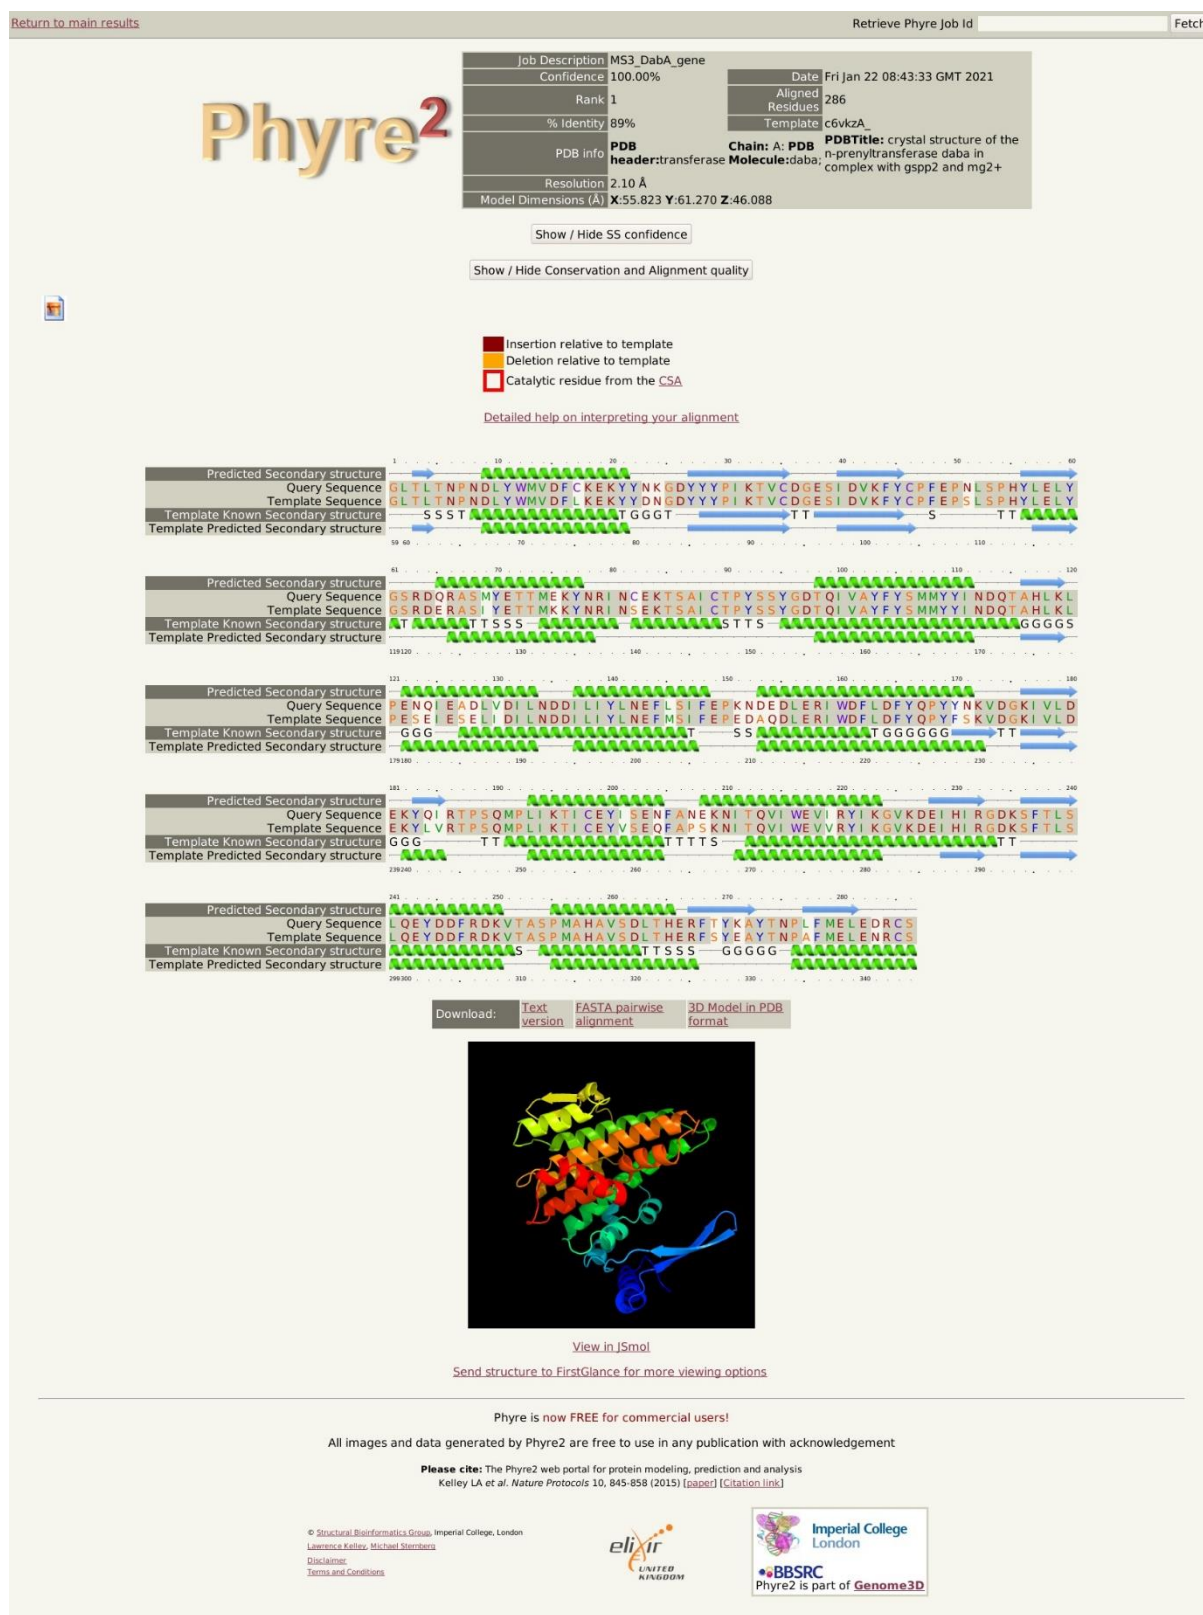

**Figure S1.** Homology modelling of the translated sequence of the *dabA* gene from *Pseudo-nitzschia multistriata*, strain MS3. Most of the secondary structures are recovered and the protein resembles the published crystalline structure.

**Table S1.** ITS accession numbers of strains used in the phylogeny reconstruction.

| Species                                        | Strain       | Geographical Area                           | Genbank ITS Accession | GenBank <i>dabA</i> Accession | Reference for Toxicity |
|------------------------------------------------|--------------|---------------------------------------------|-----------------------|-------------------------------|------------------------|
| <i>P. abrensis</i>                             | PnMi81       | Malaysia (Borneo)                           | KX572953              |                               | [1]                    |
| <i>P. americana</i>                            | PH25         | E Australia (NSW)                           | KC017472              |                               | [2]                    |
| <i>P. arctica</i>                              | P2F2         | Greenland                                   | KT589421              |                               | [3]                    |
| <i>P. arenysensis</i>                          | CHB          | E Australia (NSW)                           | KC017466              |                               | [4]                    |
| <i>P. australis</i>                            | Delta 2      | Portugal (Aveiro)                           | EU684233              |                               | [5]                    |
|                                                | L3.16        | Namibia                                     | MH376354              |                               | [6]                    |
| <i>P. batesiana</i>                            | PnMi32       | Malaysia (Borneo)                           | KX572953              |                               | [1]                    |
| <i>P. bipertita</i>                            | MC4571       | Malaysia (Borneo)                           | MT023649              |                               | [1]                    |
| <i>P. bucculenta</i>                           | L1.3         | Namibia                                     | MH376341              |                               | [6]                    |
| <i>P. caciantha</i>                            | PnSL05       | E Australia (NSW)                           | KF482056.1            |                               | [7]                    |
|                                                | COOG100215-1 | E Australia (NSW)                           | LC154962              |                               | [7]                    |
| <i>P. calliantha</i>                           | (09)2A12     | Greece (Aegean)                             | JF714901              |                               | [8]                    |
|                                                | ICMB–158     | Spain (Catalonia)                           | EU327378              |                               | [9]                    |
|                                                | WAG          | E Australia (NSW)                           | KC017463              |                               | [4]                    |
|                                                | PNF 1020 2   | NE Adriatic                                 |                       |                               | This study             |
|                                                | PNF 1020 5   | NE Adriatic                                 |                       |                               | This study             |
|                                                | PNF 1020 3   | NE Adriatic                                 |                       |                               | This study             |
| <i>P. circumspora</i>                          | BF–818–B2    | NE Adriatic                                 |                       |                               | This study             |
|                                                |              |                                             |                       |                               |                        |
| <i>P. chiniana</i>                             | PnSb58       | Malaysia (Borneo)                           | JN252430              |                               | [10]                   |
| <i>P. cuspidata</i>                            | MC3012       | Taiwan Strait                               | MK411964              |                               | [11]                   |
| <i>P. cuspidata</i>                            | MER          | E Australia (NSW)                           | KC017465              |                               | [4]                    |
| <i>P. cuspidata</i> var. <i>manzanillensis</i> | SQS–2017a    | Mexico (Pacific)                            | KU527659              |                               | [12]                   |
| <i>P. decipiens</i>                            | S1.6         | Namibia                                     | MH376345              |                               | [6]                    |
| <i>P. delicatissima</i>                        | 219 A1       | NE Adriatic                                 | MN634971.1            |                               | This study             |
|                                                | 219 A2       | NE Adriatic                                 | MN634973.1            |                               | This study             |
|                                                | 219 A3       | NE Adriatic                                 | MN634969.1            |                               | This study             |
|                                                | 219 B1       | NE Adriatic                                 | MN634972.1            |                               | This study             |
|                                                | 219 B2       | NE Adriatic                                 | MN634970.1            |                               | This study             |
|                                                | 219 B3       | NE Adriatic                                 | MN634967.1            |                               | This study             |
|                                                | 119 A2       | NE Adriatic                                 | MN634965.1            |                               | This study             |
|                                                | 119 B3       | NE Adriatic                                 | MN634964.1            |                               | This study             |
|                                                | 119 C1       | NE Adriatic                                 | MN634966.1            |                               | This study             |
|                                                | 119 C4       | NE Adriatic                                 | MN634968.1            |                               | This study             |
|                                                | ICMB–102     | Spain (Catalonia)                           | EU478793              |                               | [9]                    |
|                                                | (10)4A5      | Greece (Aegean)                             | JF714910.             |                               | [8]                    |
|                                                | Pn100–07A2   | Northwestern Atlantic Ocean (Gulf of Maine) | KF006826              |                               | [13]                   |
| <i>P. dolorosa</i>                             | S3.2         | Namibia                                     | MH376344              |                               | [6]                    |
| <i>P. fraudulent</i>                           | S2.1         | Namibia                                     | MH376349              |                               | [6]                    |
| <i>P. fryxelliana</i>                          | NWFSC 241    | E Pacific (Washington, USA)                 | JN050288              |                               | [14]                   |
| <i>P. fukuyoi</i>                              | PnLk02       | Malaysia (Borneo)                           | JN252420              |                               | [15]                   |

|                                          |               |                                               |            |          |            |
|------------------------------------------|---------------|-----------------------------------------------|------------|----------|------------|
| <i>P. galaxiae</i>                       | 00MA090919-C1 | NE Adriatic                                   | MW527383   |          | This study |
|                                          | 00MA090919-A2 | NE Adriatic                                   | MW527387   |          | This study |
|                                          | BAT2          | NE Adriatic                                   | MW527386   |          | This study |
|                                          | B1M           | NE Adriatic                                   | MW527388   |          | This study |
|                                          | B2S           | NE Adriatic                                   | MW527390   |          | This study |
|                                          | B3S           | NE Adriatic                                   | MW527391   |          | This study |
|                                          | C2L           | NE Adriatic                                   | MW527384   |          | This study |
|                                          | MC994         | Taiwan Strait                                 | MK411977   |          | [11]       |
|                                          | (10)4A3       | Greece (Aegean)                               | JF714915   |          | [8]        |
| <i>P. hallegraeffii</i>                  | CTD44 2       | E Australia (NSW)                             | MF044023   |          | [16]       |
| <i>P. hasleana</i>                       | NWFSC 186     | E Pacific (Washington, USA)                   | N050282    |          | [14]       |
| <i>P. kodamae</i>                        | Pnmi92        | Malaysia (Borneo)                             | KR021310   |          | [1]        |
|                                          | PnPd31        | Malaysia (Malacca)                            | KF482051   |          | [15]       |
| <i>P. limii</i>                          | Pnmi16        | Malaysia (Borneo)                             | KR021311   |          | [1]        |
| <i>P. linea</i>                          | ICMB–156      | Spain (Catalonia)                             | FJ489632   |          | [9]        |
| <i>P. lineola</i>                        | NWFSC 188     | Malaysia (Malacca)                            | MT040024   |          | [15]       |
| <i>P. lundholmiae</i>                    | Pnmi01        | Malaysia (Borneo)                             | KR021315   |          | [1]        |
| <i>P. mannii</i>                         | (08)10A2      | Greece (Aegean)                               | JF714905   |          | [8]        |
| <i>P. micropora</i>                      | PS90/1        | E Australia (NSW)                             | KC017448   |          | [2]        |
| <i>P. multiseriis</i>                    | COOG          | E Australia (NSW)                             | KC017469   |          | [4]        |
|                                          | Pn-1          | Northwestern Atlantic Ocean (Chesapeake Bay)) | DQ445651   |          | [17]       |
| <i>P. multistriata</i>                   | MS2           | NE Adriatic                                   | MW527382   | MZ486437 | This study |
|                                          | MS3           | NE Adriatic                                   | MW527381   | MZ486439 | This study |
|                                          | 119 A3        | NE Adriatic                                   | MN634976.1 |          | This study |
|                                          | 119 A4        | NE Adriatic                                   | MN634975.1 | MZ486438 | This study |
|                                          | 119 C4        | NE Adriatic                                   | MN634974.1 | MZ486440 | This study |
|                                          | PH25C         | E Australia (NSW)                             | KC017470   |          | [4]        |
|                                          | MC4171        | Taiwan Strait                                 | MK411975   |          | [2]        |
|                                          | Pnmi07        | Malaysia (Borneo)                             | KR021314   |          | [1]        |
| <i>P. nanaoensis</i>                     | MC4213        | South China Sea (Guangdong coast)             | MG787882   |          | [18]       |
| <i>P. plurisecta</i>                     | L3.9          | Namibia                                       | MH376350   |          | [6]        |
| <i>P. pseudodelicatis-sima</i>           | P–11          | Portugal                                      | AY257854.  |          | [19]       |
|                                          | (09)10A4      | Greece (Aegean)                               | JF714921   |          | [8]        |
| <i>P. pungens</i>                        | ICMB–143      | Spain (Catalonia)                             | EU327366   |          | [9]        |
|                                          | (10)4A2       | Greece (Aegean)                               | JF714922   |          | [8]        |
| <i>P. pungens</i> var. <i>cingulata</i>  | L3.13         | Namibia                                       | MH376355   |          | [6]        |
| <i>P. pungens</i> var. <i>aveirensis</i> | Alfa 1        | Portugal (Aveiro)                             | EU684234   |          | [5]        |
| <i>P. qiana</i>                          | MC3033        | Taiwan Strait                                 | MK412849   |          | [2]        |
| <i>P. sabit</i>                          | MC4399        | South China Sea (Guangdong coast)             | MT040005   |          | [20]       |

|                          |                 |                                             |                       |            |
|--------------------------|-----------------|---------------------------------------------|-----------------------|------------|
| <i>P. seriata</i>        | Pn114–08C2      | Northwestern Atlantic Ocean (Gulf of Maine) | KF006824              | [13]       |
| <i>P. simulans</i>       | MC940           | South China Sea (Guangdong coast)           | MF374771              | [21]       |
|                          | MC984           | South China Sea (Guangdong coast)           | MF374772              | [21]       |
| <i>P. subcurvata</i>     | M11-04          | Antarctica (Queen Maud Land)                | MT420907              | [22]       |
|                          | M5-3            | Antarctica (Queen Maud Land)                | MT420903              | [22]       |
| <i>P. subfraudulenta</i> | PnMi155 (08)8A3 | Malaysia (Borneo)<br>Greece (Aegean)        | KR021296.<br>JF714929 | [1]<br>[8] |
| <i>P. subpacific</i>     | MC4435          | South China Sea (Guangdong coast)           | MT040017              | [20]       |
| <i>P. uniseriata</i>     | MC4196          | South China Sea (Guangdong coast)           | MT040024              | [20]       |
| <i>P. yuensis</i>        | MC3209          | South China Sea (Guangdong coast)           | MT040025              | [20]       |

## References

- Teng, S.T.; Tan, S.N.; Lim, H.C.; Dao, V.H.; Bates, S.S.; Leaw, C.P. High diversity of *Pseudo-nitzschia* along the northern coast of Sarawak (Malaysian Borneo), with descriptions of *P. bipertita* sp. nov. and *P. limii* sp. nov. (Bacillariophyceae). *J. Phycol.* **2016**, *52*, 973–989, doi:10.1111/jpy.12448.
- Ajani, P.A.; Murray, S.; Hallegraeff, G.; Brett, S.; Armand, L. First reports of *Pseudo-nitzschia micropora* and *P. hasleana* (Bacillariaceae) from the Southern Hemisphere: Morphological, molecular and toxicological characterization. *Phycol. Res.* **2013**, *61*, 237–248, doi:10.1111/pre.12020.
- Lundholm, N.; Krock, B.; John, U.; Skov, J.; Cheng, J.; Pančić, M.; Wohlrab, S.; Rigby, K.; Nielsen, T.G.; Selander, E.; et al. Induction of domoic acid production in diatoms—Types of grazers and diatoms are important. *Harmful Algae* **2018**, *79*, 64–73, doi:10.1016/j.hal.2018.06.005.
- Ajani, P.A.; Murray, S.; Hallegraeff, G.; Lundholm, N.; Gillings, M.; Brett, S.; Armand, L. The diatom genus *Pseudo-nitzschia* (Bacillariophyceae) in New South Wales, Australia: Morphotaxonomy, molecular phylogeny, toxicity, and distribution. *J. Phycol.* **2013**, *49*, 765–785, doi:10.1111/jpy.12087.
- Churro, C.I.; Carreira, C.C.; Rodrigues, F.J.; Craveiro, S.C.; Calado, A.J.; Casteleyn, G.; Lundholm, N. Diversity and abundance of potentially toxic *Pseudo-nitzschia* Peragallo in Aveiro coastal lagoon, Portugal and description of a new variety, *P. pungens* var. *aveirensis* var. nov. *Diatom Res.* **2009**, *24*, 35–62, doi:10.1080/0269249X.2009.9705782.
- Gai, F.F.; Hedemand, C.K.; Louw, D.C.; Grobler, K.; Krock, B.; Moestrup, Ø.; Lundholm, N. Morphological, molecular and toxigenic characteristics of Namibian *Pseudo-nitzschia* species – including *Pseudo-nitzschia bucculenta* sp. nov. *Harmful Algae* **2018**, *76*, 80–95, doi:10.1016/j.hal.2018.05.003.
- Ajani, P.; Kim, J.H.; Han, M.S.; Murray, S.A. The first report of the potentially harmful diatom *Pseudo-nitzschia caciantha* from Australian coastal waters. *Phycol. Res.* **2016**, *64*, 312–317, doi:10.1111/pre.12142.
- Moschandreou, K.K.; Baxevanis, A.D.; Katikou, P.; Papaefthimiou, D.; Nikolaidis, G.; Abatzopoulos, T.J. Inter- and intra-specific diversity of *Pseudo-nitzschia* (Bacillariophyceae) in the northeastern Mediterranean. *Eur. J. Phycol.* **2012**, *47*, 321–339, doi:10.1080/09670262.2012.713998.
- Quijano-Scheggia, S.; Garcés, E.; Andree, K.B.; de la Iglesia, P.; Diogène, J.; Fortuño, J.M.; Camp, J. Especies *Pseudo-nitzschia* en la costa Catalana: Caracterización y contribución al conocimiento actual de la distribución del género en el mar Mediterráneo. *Sci. Mar.* **2010**, *74*, 395–410, doi:10.3989/scimar.2010.74n2395.
- Lim, H.C.; Leaw, C.P.; Su, S.N.P.; Teng, S.T.; Usup, G.; Mohammad-Noor, N.; Lundholm, N.; Kotaki, Y.; Lim, P.T. Morphology and molecular characterization of *Pseudo-nitzschia* (Bacillariophyceae) from Malaysian Borneo, including the new species *Pseudo-nitzschia circumpora* sp. nov. *J. Phycol.* **2012**, *48*, 1232–1247, doi:10.1111/j.1529-8817.2012.01213.x.
- Huang, C.X.; Dong, H.C.; Lundholm, N.; Teng, S.T.; Zheng, G.C.; Tan, Z.J.; Lim, P.T.; Li, Y. Species composition and toxicity of the genus *Pseudo-nitzschia* in Taiwan Strait, including *P. chiniana* sp. nov. and *P. qiana* sp. nov. *Harmful Algae* **2019**, *84*, 195–209, doi:10.1016/j.hal.2019.04.003.
- Rivera-Vilarelle, M.; Valdez-Velázquez, L.L.; Quijano-Scheggia, S.I. Description of *Pseudo-nitzschia cuspidata* var. *manzanillensis* var. nov. (Bacillariophyceae): morphology and molecular characterization of a variety from the central Mexican pacific. *Diatom Res.* **2018**, *33*, 55–68, doi:10.1080/0269249X.2018.1426633.

13. Fernandes, L.F.; Hubbard, K.A.; Richlen, M.L.; Smith, J.; Bates, S.S.; Ehrman, J.; Léger, C.; Mafra, L.L.; Kulis, D.; Quilliam, M.; et al. Diversity and toxicity of the diatom *Pseudo-nitzschia* Peragallo in the Gulf of Maine, Northwestern Atlantic Ocean. *Deep. Res. Part II Top. Stud. Oceanogr.* **2014**, *103*, 139–162, doi:10.1016/j.dsr2.2013.06.022.
14. Lundholm, N.; Bates, S.S.; Baugh, K.A.; Bill, B.D.; Connell, L.B.; Léger, C.; Trainer, V.L. Cryptic and pseudo-cryptic diversity in diatoms-with descriptions of *Pseudo-nitzschia hasleana* sp. nov. and *P. fryxelliana* sp. nov. *J. Phycol.* **2012**, *48*, 436–454, doi:10.1111/j.1529-8817.2012.01132.x.
15. Teng, S.T.; Lim, H.C.; Lim, P.T.; Dao, V.H.; Bates, S.S.; Leaw, C.P. *Pseudo-nitzschia kodamae* sp. nov. (Bacillariophyceae), a toxigenic species from the strait of Malacca, Malaysia. *Harmful Algae* **2014**, *34*, 17–28, doi:10.1016/j.hal.2014.02.005.
16. Ajani, P.A.; Verma, A.; Lassudrie, M.; Doblin, M.A.; Murray, S.A. A new diatom species *P. hallegraeffii* sp. nov. belonging to the toxic genus *Pseudo-nitzschia* (Bacillariophyceae) from the East Australian Current. *PLoS One* **2018**, *13*, e0195622, doi:10.1371/journal.pone.0195622.
17. Thessen, A.E.; Bowers, H.A.; Stoecker, D.K. Intra- and interspecies differences in growth and toxicity of *Pseudo-nitzschia* while using different nitrogen sources. *Harmful Algae* **2009**, *8*, 792–810, doi:10.1016/j.hal.2009.01.003.
18. Li, Y.; Dong, H.C.; Teng, S.T.; Bates, S.S.; Lim, P.T. *Pseudo-nitzschia nanaoensis* sp. nov. (Bacillariophyceae) from the Chinese coast of the South China Sea. *J. Phycol.* **2018**, *54*, 918–922, doi:10.1111/jpy.12791.
19. Lundholm, N.; Moestrup, Ø.; Hasle, G.R.; Hoef-Emden, K. A study of the *Pseudo-nitzschia pseudodelicatissima/cuspidata* complex (Bacillariophyceae): What is *P. pseudodelicatissima*? *J. Phycol.* **2003**, *39*, 797–813, doi:10.1046/j.1529-8817.2003.02031.x.
20. Dong, H.C.; Lundholm, N.; Teng, S.T.; Li, A.; Wang, C.; Hu, Y.; Li, Y. Occurrence of *Pseudo-nitzschia* species and associated domoic acid production along the Guangdong coast, South China Sea. *Harmful Algae* **2020**, *98*, 101899, doi:10.1016/j.hal.2020.101899.
21. Li, Y.; Huang, C.X.; Xu, G.S.; Lundholm, N.; Teng, S.T.; Wu, H.; Tan, Z. *Pseudo-nitzschia simulans* sp. nov. (Bacillariophyceae), the first domoic acid producer from Chinese waters. *Harmful Algae* **2017**, *67*, 119–130, doi:10.1016/j.hal.2017.06.008.
22. Olesen, A.J.; Leithoff, A.; Altenburger, A.; Krock, B.; Beszteri, B.; Eggers, S.L.; Lundholm, N. First Evidence of the Toxin Domoic Acid in Antarctic Diatom Species. *Toxins (Basel)*. **2021**, *13*, 1–11, doi:10.3390/toxins13020093.
